# Supplementary material for: Calculated ionization energies, orbital eigenvalues (HOMO), and related QSAR descriptors of organic molecules: a set of 61 experimental values enables elimination of systematic errors and provides realistic error estimates
Source: Royal Society of Chemistry journal article supplement (doi:10.1039/d4cp02342k), 2024-01-01
Supplement: d4cp02342k1.pdf [file d4cp02342k1.pdf]

Cite this: DOI: 00.0000/xxxxxxxxxx

# Calculated ionization energies, orbital eigenvalues (HOMO), and related QSAR descriptors of organic molecules: a set of 61 experimental values enables elimination of systematic errors and provides realistic error estimates—Supporting Information

Peter R. Tentscher<sup>\*a</sup>

## Contents

|         |                                                  |   |
|---------|--------------------------------------------------|---|
| Text S1 | Vibrational and thermal contributions to the AIE | 1 |
| Text S2 | Details on CCSD(T) calculations                  | 1 |
| Text S3 | Iodine-containing organic molecules              | 2 |
| Text S4 | Relationship between descriptors                 | 2 |
| Text S5 | Details on illustrative QSAR applications        | 2 |

## List of Tables

|    |                                                                                                                                                                    |   |
|----|--------------------------------------------------------------------------------------------------------------------------------------------------------------------|---|
| S1 | Components of CCSD(T)/CBS adiabatic ionization energies [eV]                                                                                                       | 5 |
| S2 | Temperature contribution to the AIE; CCSD(T)/CBS values for VIE and $\lambda$ [eV]                                                                                 | 6 |
| S3 | Deviation of electronic AIE (ROHF/ROKS) from the electronic, non-relativistic reference values ( $IE_{el,NR}$ , †Table S1) before and after linear regression [eV] | 7 |
| S4 | Experimental AIEs (at 0 K) from PFI experiments [eV]                                                                                                               | 7 |

## List of Figures

|         |                                                  |
|---------|--------------------------------------------------|
| Text S1 | Vibrational and thermal contributions to the AIE |
|---------|--------------------------------------------------|

The difference in zero-point vibrational energy was evaluated using the computed vibrational frequencies from the DFT calculations described above, using the GoodVibes v3.2<sup>1</sup> package. Frequencies were scaled with scaling factors of 0.96 for B2PLYPD and

0.9675 for B3LYP, based on the scaling factors for similar basis sets in the CCCBDB<sup>2</sup>. To evaluate the effects of temperature, the difference in the Gibbs free energy  $G$  when including vibrational-rotational effects for a temperature of 298 K were also evaluated. Its impact on the IE is denoted  $\Delta AIE_{0K \rightarrow 298K}$ , corresponding to the change in the calculated AIE going from 0 K to 298 K. For the vibrational frequencies, the quasi-harmonic approximation of Grimme<sup>3</sup> was used for vibrational frequencies  $< 100 \text{ cm}^{-1}$ .

## Text S2 Details on CCSD(T) calculations

The CBS extrapolation used the augh-cc-pVXZ(2df)<sup>4–7</sup> (X=D,T,Q) basis sets, where “h” refers to the augmentation of only non-hydrogen atoms. For As and Br, regular aug-cc-pVXZ was used instead. The HF energy and the CCSD correlation energy were extrapolated as a (T,Q) extrapolation and the (T) correlation energy as a (D,T) extrapolation:

$$E_{HF}/CBS = E_{HF/Q} + \frac{E_{HF/Q} - E_{HF/T}}{\left(\frac{4}{3}\right)^5 - 1} \quad (1)$$

$$\Delta E_{HF}^{CCSD}/CBS = \Delta E_{HF/Q}^{CCSD} + \frac{\Delta E_{HF/Q}^{CCSD} - \Delta E_{HF/T}^{CCSD}}{\left(\frac{4}{3}\right)^{3.22} - 1} \quad (2)$$

$$\Delta E_{CCSD}^{CCSD(T)}/CBS = \Delta E_{CCSD/T}^{CCSD(T)} + \frac{\Delta E_{CCSD/T}^{CCSD(T)} - \Delta E_{CCSD/D}^{CCSD(T)}}{\left(\frac{3}{2}\right)^{3.22} - 1} \quad (3)$$

For some larger molecules (1-naphtol, azulene, benzimidazole, naphtalene, DABCO, and dibenzofuran), the cc-pVXZ (X=T,Q) basis set was used for  $\Delta E_{HF}^{CCSD}/CBS$ . For dibenzofuran, the cc-pVXZ (X=D,T) basis set was also used for  $\Delta E_{CCSD}^{CCSD(T)}/CBS$ , whereas the augh-cc-pVXZ(2df) basis sets were used for the other components.

$\Delta E_{FC}^{AE}$  was calculated either with the MTSmall basis set as defined in the W1 method (essentially an uncontracted pVTZ basis), or with the cc-pwCVTZ<sup>8</sup> basis set, and for some larger molecules (1-naphtol, azulene, dibenzofuran, naphtalene, benzimidazole, and thymine) with the cc-pwCVDZ<sup>8</sup> basis set. For Br, the cc-

<sup>a</sup> Dortmund, Germany. E-mail: peter.r.tentscher@runbox.com

pwCVQZ<sup>8</sup> basis set was used, and for As, the HGBSP1-5<sup>9</sup> basis set was used (an uncontracted basis set by design), whereas cc-pwCVTZ<sup>8</sup> was used for the other atom types.

$\Delta E_{NR}^{SR}$  was calculated with the second order Douglas-Kroll-Hess method<sup>10</sup>. It was either calculated as  $E_{SR}/MTSmall - E_{nonrel}/MTSmall$  or as  $E_{SR}/Jorge - TZP - DKH - E_{nonrel}/Jorge - TZP$  using Jorge's basis sets<sup>11,12</sup> optimized for the respective type of calculation. Unless otherwise mentioned, the calculations on open-shell species were performed based with a restricted open shell (ROHF) reference determinant. Additional calculations with the unrestricted reference determinant (UHF) were carried out to calculate CCSD(T)/CBS energies in the frozen-core, non-relativistic approximation. These were combined with  $\Delta E_{FC}^{AE}$  and  $\Delta E_{NR}^{SR}$  from ROHF-based calculations form a combined electronic energy, which is referred to as UHF-CCSD(T) hereafter.

### Text S3 Iodine-containing organic molecules

Molecules containing iodine were deliberately excluded in this work, since they require major changes in methodology. For iodoalkanes, SO effects are large (0.583 eV for iodoethene<sup>13</sup>) and also severely impact the geometry of the cation.<sup>14</sup> However, ionization of the halogen lone electron pairs is not of practical relevance when Iodine is attached to a conjugated  $\pi$ -system. For the practically more relevant iodobenzene, a CCSD(T)/CBS calculation was carried out as follows: CCSD(T)/CBS with the augh-cc-pVXZ-PP basis set<sup>15,16</sup> and pseudopotentials,  $\Delta E_{FC}^{AE}$  with the cc-pwCVTZ-PP<sup>17</sup> basis set, and  $\Delta E_{NR}^{SR}$  with the Jorge-TZP(-DKH) basis set.  $\Delta E_{FC}^{AE}$  and  $\Delta E_{NR}^{SR}$  both accounted for 0.01 eV). The final, composite AIE was 8.83 eV as opposed to the experimental value of 8.7580(6) eV<sup>18</sup>. The larger deviation could be caused by the use of pseudopotentials or by the insufficient treatment of relativistic effects.

### Text S4 Relationship between descriptors

*Ionization potential* (IP) is often used instead of *ionization energy* (IE). However, they are equivalent, since an IE (eV) is the energy needed to move one electron across a potential difference (V).

In the gas phase:

$$AIE_g = VIE_g - \lambda_{ox,g} \quad (4)$$

where the adiabatic and vertical IEs are connected by the reorganization energy  $\lambda_{ox,g}$ , which is the energy required to distort the n-1 electron species to the structure of the n-electron species. For a hypothetical single electron transfer (SET) reaction in the gas phase, a reaction partner needs to be reduced:

$$AEA_g = VEA_g - \lambda_{red,g} \quad (5)$$

where *EA* refers to the adiabatic or vertical electron affinity of the oxidant. The Gibbs free energy of electron transfer is then given by:

$$\Delta G_{SET,g}^{\circ} = AIE(\text{reductant}, g) + AEA(\text{oxidant}, g) \quad (6)$$

In the solution phase, absolute  $AIE_{aq}$ s are not experimentally accessible and are reported as *relative* standard half-cell reduction

or oxidation potentials (mind the sign!) *versus* the normal hydrogen electrode (NHE), often denoted  $E_{1/2}$ . They are related to the free energy of removing the electron by:

$$E_{1/2} = \left( \frac{-\Delta G_{ox}^{\circ}}{nF} + E_H^{\circ} \right) \quad (7)$$

where  $\Delta G_{ox}^{\circ}$  is the (absolute) ionization energy,  $n$  the number of transferred electrons,  $F$  is the Faraday constant that converts  $\Delta G_{ox}^{\circ}$  to V, and  $E_H^{\circ}$  the absolute potential of the NHE, estimated to be 4.28 V.<sup>19</sup> Therefore, apart from a constant, unit conversion (potential/energy), and possibly different standard state conventions,  $\Delta G_{ox}^{\circ}$  is equivalent to  $AIE_{aq}$ , and I will use  $\Delta G_{ox}^{\circ}$  and  $AIE_{aq}$  interchangeably.

The free energy of a single electron transfer is related to both half-cell reactions:

$$\Delta G_{SET}^{\circ} = E_{1/2}^{red} + E_{1/2}^{ox} = AEA_{red} + AIE_{ox} \quad (8)$$

For a series of reactions with the same oxidant,  $AIE_{aq}$  differs from  $\Delta G_{SET}^{\circ}$  only by a constant. For the linear model sketched above, the slope is identical, regardless of whether  $AIE_{aq}$  or  $\Delta G_{SET}^{\circ}$  is used.

With  $VIE_{aq} = AIE_{aq} + \lambda_{ox,aq}$ , a regression model that uses  $VIE_{aq}$  differs only by  $\lambda_{ox,aq}$  from a regression model that uses the  $AIE_{aq}$ , assuming that  $\lambda_{ox,aq}$  is constant among a set of structurally related molecules. Since  $-\epsilon_{HOMO} \approx VIE$ , models that use either  $-\epsilon_{HOMO}$  or  $VIE$  as a descriptor are equivalent but may exhibit different slopes and intercepts because of the relationship between  $VIE$  and  $-\epsilon_{HOMO}$  (Table 4 in the main text).

### Text S5 Details on illustrative QSAR applications

#### Singlet quenching by arenes

Rate constants and thermodynamics for quenching of singlet excited states by arenes in acetonitrile were taken from the literature (see references in the main text). The set included 14 quenching reactions of excited singlet states involving 10 different reductants:

- 2,9,10-tricyanoanthracene\* by *m*-xylene
- 1-cyanonaphthalene\* by 1,2,4-trimethylbenzene
- 9,10-dicyanoanthracene\* by biphenyl
- 1,4-dicyanonaphthalene\* by toluene
- 1-cyanonaphthalene\* by biphenyl
- 9,10-dicyanoanthracene\* by *p*-xylene
- 2,6,9,10-tetracyanoanthracene\* by benzene
- 2,9,10-tricyanoanthracene\* by toluene
- 1,2-benzanthracene\* by 1,4-dimethoxybenzene
- 1,2-benzanthracene\* by 1-trifluoromethyl-4-N(CH<sub>3</sub>)<sub>2</sub>-benzene
- 3,4-benzacridine\* by 1,3-dimethoxybenzene

- 3,4-benzacridine\* by 1,3,5-trimethoxybenzene
- 1-pyrenecarboxylic acid\* by 1,3-dimethoxybenzene
- 1-pyrenecarboxylic acid\* by 1,3,5-trimethoxybenzene

The experimental reduction potentials of the excited singlet state of the oxidant were taken from the literature.

For Fig. 5. (a) in the main text,  $\Delta G_{SET}$  was calculated from the difference between the experimental reduction potential and the experimental one-electron oxidation potential of the arene.

For Fig. 5. (b), The one-electron oxidation potential was replaced by  $-\epsilon_{HOMO}$ . For this calculation, the geometry of the reductant was optimized at the B3LYP/6-311+G(2df,2pd) level of theory, with solvation effects accounted for by the SMD implicit solvation model.  $-\epsilon_{HOMO}$  used the same level of theory. For  $-\epsilon_{HOMO} - E_{red}^{\circ}$ , a shift of  $-4.28$  eV (the absolute potential of the SHE) and  $-0.241$  eV (the potential of the calomel electrode) was applied. This shifts the scale of the x-axis to that of the experimental data, but has no influence on the regression.

For Fig. 5 (c), the  $AIE_{aq}$  was calculated at the B3LYP/6-311+G(2df,2pd) level of theory, and accounted for solvation effects with the SMD model.  $AIE_{aq}$  was calculated as the difference of Gibbs' free energies at 298 K, i.e., rotational and vibrational contributions to G from a normal mode analysis were considered. The resulting  $AIE_{aq}$  was adjusted for electrode potentials (see above).

For Fig. 5 (d),  $AIE_{aq}$  was evaluated as the sum of  $AIE_{gas}$  and  $\Delta\Delta G_{solv}$ . For all solutes, the geometries were optimized in the gas phase using B3LYP/6-311+G(2df,2pd), and vibrational/rotational contributions to G were evaluated at this level of theory. Where available, an experimental gas phase  $AIE_{gas, 0 K}$  from PFI/MATI experiments was corrected with thermal contributions (from the B3LYP calculations) to yield  $AIE_{gas, 298 K}$  (1,3-dimethoxybenzene, 1,4-dimethoxybenzene, benzene, toluene, p-xylene). For the other compounds, the electronic IE was estimated using eq. 9 in the main text, with electronic energies evaluated at the PWPB95/def2-TZVPPD level of theory.  $AIE_{gas, 298 K}$  was complemented with  $\Delta G_{solv}$  from separate SMD calculations at the B3LYP/6-31+G(d,p) level of theory and using the (frozen) gas phase geometries. The resulting  $AIE_{aq}$  was adjusted for electrode potentials (see above).

### Aqueous oxidation of organics by $ClO_2^{\cdot}$

Experimental second order rate constants were taken from the NIST solution kinetics database. The chosen reactants were 2,4-hexadiene-1-ol, 2,5-dimethylfuran, 2-methoxyphenolate, 4-methoxyphenol, aniline, anthracene, DABCO, dimethylamine, furfuryl alcohol, hydroquinone, indole, isobutylthiolate, methylamine, N,N-dimethylaniline, phenolate, phenol, piperidine, and trimethylamine.

For Fig. 6 (a),  $-\epsilon_{HOMO}$  was calculated at the B3LYP/def2-TZVPPD level of theory. A regression correction was applied to  $-\epsilon_{HOMO}$ , but this has no impact on the quality of the fit.

For Fig. 6 (b), the best estimate of  $AIE_{aq}$  was calculated in the same way as for Fig. 5 (c), but using B3LYP/def2-TZVPPD for gas phase geometries and  $\Delta G_{solv}$  with the SMD model. For almost

all compounds in the set,  $AIE_{gas, 0 K}$  from PFI/MATI experiments or an estimate of the (gas phase) electronic IE at W1 level was available.

For Fig 6. (c), the  $AIE_{aq}$  from Fig. 6 (b) was used. Reorganization energies  $\lambda$  were calculated using B3LYP/def2-TZVPPD as follows.  $\lambda_{gas} = VIE_{gas} - AIE_{el.,gas}$ , that is, only electronic energies were considered.  $\lambda_{aq}$  was evaluated using the (frozen) gas phase geometry of the neutral molecule and the cation, as  $\lambda_{aq} = E(n-1, R(neutral)) - E(n-1, R(cation))$  where R refers to the (gas phase) optimized geometry of either the neutral or the cation. For  $E(n-1, R(neutral))$ , a VIE calculation with non-equilibrium solvation was performed. The solvation contribution to  $\lambda$  was evaluated as  $\lambda_{solv} = \lambda_{aq} - \lambda_{gas}$ . The expression used for the energy on the x-axis is similar to those used by Marcus or Rehm and Weller. However, the former usually employ free energies and  $\lambda$  that refer to the whole SET reaction, whereas here, only the oxidation half-cell reaction was considered. To correct the quadratic term, 5.215 eV were subtracted, which is close to a correction for the (absolute) reduction potential of  $ClO_2^{\cdot}$ . Note that the reorganization energy of  $ClO_2^{\cdot}$  is missing from the expression.  $\lambda_{solv, SET}$  of the overall SET reaction cannot be cleanly partitioned between both reactants.  $\lambda_{solv, SET}$  refers to the encounter complex, where SET yields a zwitterion. In contrast,  $\lambda_{solv}$  of the reductant yields a solvated radical cation, which is likely an overestimation of the solvent effect. Consequently,  $\lambda_{solv}$  was scaled by an empirical factor of 0.16, which yielded the best fit (the other parameters were kept fixed). Real applications of this type of equation should further explore how  $\lambda_{solv, SET}$  is best approximated.

### Notes and references

- 1 G. Luchini, J. Alegre-Requena, I. Funes-Ardoiz and R. Paton, *F1000Research*, 2020, **9**, 1–14.
- 2 *NIST Computational Chemistry Comparison and Benchmark Database; NIST Standard Reference Database Number 101; Release 22, May 2022, 2022*, <http://cccbdb.nist.gov/>.
- 3 S. Grimme, *Chem. Eur. J.*, 2012, **18**, 9955–9964.
- 4 T. H. Dunning, *J. Chem. Phys.*, 1989, **90**, 1007–1023.
- 5 D. E. Woon and T. H. Dunning, *J. Chem. Phys.*, 1993, **98**, 1358–1371.
- 6 A. K. Wilson, D. E. Woon, K. A. Peterson and T. H. Dunning, *J. Chem. Phys.*, 1999, **110**, 7667–7676.
- 7 R. A. Kendall, T. H. Dunning and R. J. Harrison, *J. Chem. Phys.*, 1992, **96**, 6796–6806.
- 8 K. A. Peterson and T. H. Dunning, *J. Chem. Phys.*, 2002, **117**, 10548–10560.
- 9 S. Lehtola, *J. Chem. Phys.*, 2020, **152**, 134108.
- 10 G. Jansen and B. A. Hess, *Phys. Rev. A*, 1989, **39**, 6016–6017.
- 11 F. E. Jorge, A. C. Neto, G. G. Camiletti and S. F. Machado, *J. Chem. Phys.*, 2009, **130**, 064108.
- 12 S. F. Machado, G. G. Camiletti, A. C. Neto, F. E. Jorge and R. S. Jorge, *Mol. Phys.*, 2009, **107**, 1713–1727.
- 13 N. Knoblauch, A. Strobel, I. Fischer and V. E. Bondybey, *J. Chem. Phys.*, 1995, **103**, 5417–5427.
- 14 M. Lee, H. Kim, Y. S. Lee and M. S. Kim, *J. Chem. Phys.*, 2005,

- 122, 244319.
- 15 K. A. Peterson, D. Figgen, E. Goll, H. Stoll and M. Dolg, *J. Chem. Phys.*, 2003, **119**, 11113–11123.
- 16 K. A. Peterson, B. C. Shepler, D. Figgen and H. Stoll, *J. Phys. Chem. A*, 2006, **110**, 13877–13883.
- 17 K. A. Peterson and K. E. Yousaf, *J. Chem. Phys.*, 2010, **133**, 174116.
- 18 C. H. Kwon, H. L. Kim and M. S. Kim, *J. Chem. Phys.*, 2002, **116**, 10361–10371.
- 19 D. G. Truhlar, C. J. Cramer, A. Lewis and J. A. Bumpus, *J. Chem. Educ.*, 2007, **84**, 934.
- 20 S. Canonica and P. G. Tratnyek, *Environ. Toxicol. Chem.*, 2003, **22**, 1743–1754.
- 21 P. R. Tentscher, M. Bourgin and U. von Gunten, *Environ. Sci. Technol.*, 2018, **52**, 4763–4773.
- 22 M. Lee, S. G. Zimmermann-Steffens, J. S. Arey, K. Fenner and U. von Gunten, *Environ. Sci. Technol.*, 2015, **49**, 9925–9935.
- 23 T. Ye, Z. Wei, R. Spinney, D. D. Dionysiou, S. Luo, L. Chai, Z. Yang and R. Xiao, *Chem. Eng. J.*, 2017, **317**, 258–266.
- 24 H. Su, C. Yu, Y. Zhou, L. Gong, Q. Li, P. J. Alvarez and M. Long, *Water Res.*, 2018, **140**, 354–363.
- 25 W. A. Arnold, Y. Oueis, M. O'Connor, J. E. Rinaman, M. G. Taggart, R. E. McCarthy, K. A. Foster and D. E. Latch, *Environ. Sci.: Processes Impacts*, 2017, **19**, 324–338.
- 26 A. J. Salter-Blanc, E. J. Bylaska, M. A. Lyon, S. C. Ness and P. G. Tratnyek, *Environ. Sci. Technol.*, 2016, **50**, 5094–5102.
- 27 W. A. Arnold, *Environ. Sci.: Processes Impacts*, 2014, **16**, 832–838.
- 28 Y.-n. Wang, J. Chen, X. Li, S. Zhang and X. Qiao, *QSAR Comb. Sci.*, 2009, **28**, 1309–1316.
- 29 M. Schindler, *Chemosphere*, 2016, **154**, 23–33.

Table S1 Components of CCSD(T)/CBS adiabatic ionization energies [eV]

| Compound                          | $IE_{HF}$ | $\Delta IE_{HF}^{CCSD}$ | $\Delta IE_{CCSD}^{CCSD(T)}$ | $\Delta IE_{FC}^{AE}$ | Basis <sup>a</sup> | $\Delta IE_{NR}^{SR}$ | Basis <sup>a</sup> | $\Delta IE_{ZPVE}$ | $\Delta AIE_{calc}^{exp}$ | $IE_{el..NR}$ |
|-----------------------------------|-----------|-------------------------|------------------------------|-----------------------|--------------------|-----------------------|--------------------|--------------------|---------------------------|---------------|
| DABCO                             | 6.818     | 0.482                   | -0.092                       | 0.000                 | pwCVTZ             | -0.002                | Jorge-TZP          | 0.030              | 0.041                     | 7.168         |
| Radical-Benzyl                    | 6.271     | 0.910                   | -0.001                       | 0.017                 | MTSmall            | -0.002                | MTSmall            | 0.062              | 0.007                     | 7.190         |
| Azulene                           | 6.134     | 1.094                   | 0.154                        | 0.009                 | pwCVDZ             | -0.005                | Jorge-TZP          | 0.025              | -0.001                    | 7.392         |
| N-methylaniline                   | 6.548     | 0.786                   | 0.053                        | 0.010                 | pwCVTZ             | -0.006                | Jorge-TZP          | 0.044              | 0.018                     | 7.379         |
| Aniline                           | 6.779     | 0.862                   | 0.069                        | 0.008                 | pwCVTZ             | -0.004                | Jorge-TZP          | 0.026              | 0.020                     | 7.698         |
| 1-naphtol                         | 6.758     | 0.961                   | 0.045                        | 0.009                 | pwCVDZ             | -0.005                | Jorge-TZP          | 0.025              | 0.027                     | 7.746         |
| Thioanisole                       | 7.120     | 0.796                   | 0.025                        | 0.008                 | pwCVTZ             | -0.008                | Jorge-TZP          | 0.007              | 0.025                     | 7.925         |
| Hydroquinone                      | 6.869     | 0.964                   | 0.071                        | 0.011                 | pwCVTZ             | -0.002                | Jorge-TZP          | 0.044              | 0.021                     | 7.894         |
| Piperidine                        | 6.962     | 1.059                   | 0.051                        | 0.002                 | pwCVTZ             | -0.003                | Jorge-TZP          | -0.027             | 0.022                     | 8.053         |
| Dibenzofuran                      | 7.177     | 0.935                   | 0.037                        | 0.012                 | pwCVDZ             | -0.004                | Jorge-TZP          | -0.017             | 0.028                     | 8.132         |
| Radical-Allyl                     | 6.916     | 1.127                   | 0.024                        | 0.020                 | MTSmall            | -0.004                | MTSmall            | 0.057              | 0.009                     | 8.077         |
| Naphtalene                        | 7.173     | 0.955                   | 0.033                        | 0.011                 | pwCVDZ             | -0.005                | Jorge-TZP          | 0.006              | 0.029                     | 8.143         |
| Pyrrole                           | 6.976     | 1.141                   | 0.109                        | 0.018                 | MTSmall            | 0.000                 | MTSmall            | -0.005             | 0.028                     | 8.215         |
| Anisole                           | 7.235     | 0.945                   | 0.066                        | 0.014                 | pwCVTZ             | -0.005                | Jorge-TZP          | -0.001             | 0.021                     | 8.238         |
| E-hexatriene                      | 7.098     | 1.076                   | 0.079                        | 0.019                 | MTSmall            | -0.001                | MTSmall            | 0.014              | 0.015                     | 8.255         |
| Benzimidazole                     | 7.332     | 1.016                   | 0.059                        | 0.011                 | pwCVDZ             | -0.005                | Jorge-TZP          | -0.014             | 0.024                     | 8.394         |
| Radical-Cyclopent.                | 6.905     | 1.350                   | 0.093                        | 0.017                 | MTSmall            | 0.000                 | MTSmall            | 0.053              | -0.009                    | 8.374         |
| Phenol                            | 7.444     | 0.990                   | 0.079                        | 0.014                 | pwCVTZ             | -0.003                | Jorge-TZP          | 0.011              | 0.027                     | 8.501         |
| (CH <sub>3</sub> ) <sub>2</sub> S | 7.696     | 0.974                   | 0.067                        | 0.001                 | MTSmall            | -0.009                | MTSmall            | -0.036             | 0.003                     | 8.736         |
| Radical-Propargyl                 | 7.822     | 0.853                   | -0.018                       | 0.019                 | MTSmall            | -0.003                | MTSmall            | 0.039              | 0.011                     | 8.665         |
| Pyridazine                        | 8.110     | 0.619                   | -0.003                       | -0.003                | pwCVTZ             | 0.003                 | Jorge-TZP          | 0.011              | 0.027                     | 8.696         |
| Thiophene                         | 7.770     | 1.063                   | 0.086                        | 0.017                 | MTSmall            | -0.004                | MTSmall            | -0.025             | 0.032                     | 8.904         |
| Furan                             | 7.627     | 1.177                   | 0.100                        | 0.022                 | MTSmall            | -0.003                | MTSmall            | -0.016             | 0.019                     | 8.906         |
| Thymine                           | 8.026     | 0.895                   | 0.051                        | 0.009                 | pwCVDZ             | -0.007                | Jorge-TZP          | -0.032             | 0.024                     | 8.956         |
| Bromobenzene                      | 8.118     | 0.878                   | 0.043                        | 0.012                 | pwCVT(Q)Z          | 0.011                 | Jorge-TZP          | -0.011             | 0.053                     | 8.998         |
| Methylamine                       | 7.863     | 1.178                   | 0.083                        | 0.000                 | MTSmall            | -0.001                | MTSmall            | -0.066             | 0.014                     | 9.109         |
| Butadiene                         | 7.823     | 1.146                   | 0.101                        | 0.021                 | MTSmall            | 0.000                 | MTSmall            | -0.009             | 0.013                     | 9.077         |
| Chlorobenzene                     | 8.105     | 0.945                   | 0.059                        | 0.016                 | MTSmall            | -0.006                | MTSmall            | -0.013             | 0.034                     | 9.091         |
| Phenylsilane                      | 8.041     | 1.071                   | 0.100                        | 0.020                 | pwCVTZ             | -0.003                | Jorge-TZP          | -0.062             | 0.031                     | 9.200         |
| Pyridine                          | 8.127     | 1.093                   | 0.059                        | 0.003                 | MTSmall            | 0.000                 | MTSmall            | -0.052             | 0.032                     | 9.250         |
| Fluorobenzene                     | 8.090     | 1.056                   | 0.084                        | 0.020                 | MTSmall            | -0.003                | MTSmall            | -0.017             | 0.027                     | 9.223         |
| Benzene                           | 8.143     | 1.083                   | 0.091                        | 0.021                 | MTSmall            | 0.000                 | MTSmall            | -0.085             | 0.009                     | 9.329         |
| Pyrazine                          | 9.647     | -0.034                  | -0.209                       | 0.004                 | pwCVTZ             | -0.001                | Jorge-TZP          | -0.080             | 0.039                     | 9.369         |
| Tetrachloroethene                 | 8.522     | 0.818                   | 0.007                        | 0.011                 | MTSmall            | -0.015                | MTSmall            | 0.008              | 0.025                     | 9.333         |
| Pyrimidine                        | 9.297     | 0.245                   | -0.133                       | 0.003                 | MTSmall            | 0.002                 | MTSmall            | -0.037             | 0.045                     | 9.367         |
| Thiazole                          | 8.243     | 1.094                   | 0.072                        | 0.021                 | MTSmall            | -0.008                | MTSmall            | -0.037             | 0.022                     | 9.409         |
| Methanethiol                      | 8.441     | 0.983                   | 0.069                        | 0.004                 | MTSmall            | -0.010                | MTSmall            | -0.033             | -0.001                    | 9.498         |
| Oxazole                           | 8.269     | 1.257                   | 0.097                        | 0.026                 | MTSmall            | -0.003                | MTSmall            | -0.033             | 0.017                     | 9.632         |
| E-1,2-diCl-ethene                 | 8.671     | 0.967                   | 0.043                        | 0.012                 | MTSmall            | -0.010                | MTSmall            | -0.003             | 0.022                     | 9.671         |
| Oxetane                           | 8.579     | 1.180                   | 0.059                        | 0.005                 | MTSmall            | -0.006                | MTSmall            | -0.111             | 0.037                     | 9.785         |
| Benzonitrile                      | 8.827     | 0.919                   | 0.050                        | 0.020                 | pwCVTZ             | -0.003                | Jorge-TZP          | -0.041             | 0.041                     | 9.776         |
| Bromoethene                       | 8.765     | 1.041                   | 0.060                        | 0.009                 | pwCVT(Q)Z          | -0.019                | Jorge-TZP          | -0.017             | 0.019                     | 9.856         |
| AsH <sub>3</sub>                  | 8.566     | 1.077                   | 0.076                        | 0.002                 | HGBSB1-5           | 0.069                 | Jorge-TZP          | -0.005             | -0.040                    | 9.761         |
| Radical-CH <sub>3</sub>           | 8.867     | 0.854                   | 0.060                        | 0.021                 | MTSmall            | -0.002                | MTSmall            | 0.042              | 0.002                     | 9.799         |
| PH <sub>3</sub>                   | 8.620     | 1.150                   | 0.082                        | 0.021                 | MTSmall            | 0.008                 | MTSmall            | -0.011             | -0.008                    | 9.881         |
| Diacetylene                       | 9.239     | 0.929                   | 0.032                        | 0.024                 | MTSmall            | 0.001                 | MTSmall            | -0.011             | 0.038                     | 10.185        |
| NH <sub>3</sub>                   | 8.775     | 1.348                   | 0.101                        | 0.005                 | MTSmall            | -0.001                | MTSmall            | -0.041             | 0.001                     | 10.228        |
| H <sub>2</sub> S                  | 9.379     | 1.025                   | 0.079                        | 0.009                 | MTSmall            | -0.011                | MTSmall            | -0.016             | -0.003                    | 10.495        |
| Ethene                            | 8.948     | 1.458                   | 0.152                        | 0.022                 | MTSmall            | -0.002                | MTSmall            | -0.053             | 0.011                     | 10.569        |
| Bromomethane                      | 9.712     | 0.986                   | 0.061                        | -0.007                | pwCVT(Q)Z          | -0.031                | Jorge-TZP          | -0.074             | -0.036                    | 10.789        |
| Acetic acid                       | 9.133     | 1.481                   | 0.107                        | 0.010                 | MTSmall            | -0.006                | MTSmall            | -0.047             | 0.026                     | 10.705        |
| Methanol                          | 10.064    | 0.901                   | 0.035                        | 0.002                 | MTSmall            | -0.004                | MTSmall            | -0.118             | 0.040                     | 10.962        |
| Formaldehyde                      | 9.651     | 1.247                   | 0.084                        | 0.007                 | MTSmall            | -0.005                | MTSmall            | -0.071             | 0.027                     | 10.962        |
| Chloromethane                     | 10.443    | 0.928                   | 0.048                        | 0.005                 | MTSmall            | -0.012                | MTSmall            | -0.107             | 0.002                     | 11.422        |
| Ethyne                            | 9.868     | 1.395                   | 0.146                        | 0.027                 | MTSmall            | -0.002                | MTSmall            | -0.021             | 0.012                     | 11.423        |
| Cyanoacetylene                    | 10.691    | 0.983                   | 0.021                        | 0.026                 | MTSmall            | -0.002                | MTSmall            | -0.025             | 0.051                     | 11.670        |
| Acetonitrile                      | 10.951    | 1.290                   | 0.089                        | 0.019                 | MTSmall            | 0.001                 | MTSmall            | -0.139             | 0.008                     | 12.342        |
| SO <sub>2</sub>                   | 12.277    | 0.237                   | -0.135                       | 0.015                 | MTSmall            | -0.002                | MTSmall            | -0.016             | 0.030                     | 12.364        |
| Fluoromethane                     | 12.084    | 0.659                   | -0.022                       | 0.006                 | MTSmall            | -0.004                | MTSmall            | -0.163             | 0.025                     | 12.703        |
| H <sub>2</sub> O                  | 11.090    | 1.494                   | 0.104                        | 0.010                 | MTSmall            | -0.006                | MTSmall            | -0.069             | 0.006                     | 12.692        |
| HCl                               | 11.682    | 1.053                   | 0.075                        | 0.010                 | MTSmall            | -0.013                | MTSmall            | -0.019             | 0.042                     | 12.778        |

<sup>a</sup>If no basis set is indicated in the table, the MTSmall basis set was used. <sup>b</sup>Also accounts for the experimental spin-orbit splitting, see text for details.

Table S2 Temperature contribution to the AIE; CCSD(T)/CBS values for VIE and  $\lambda$  [eV]

| Compound                                          | $\Delta AIE_{0K \rightarrow 298K}^a$ | $\Delta IE_{el. \rightarrow AIE_{298K}}^b$ | $VIE_{el.NR}^c$ | $\lambda_{NR}^d$ |
|---------------------------------------------------|--------------------------------------|--------------------------------------------|-----------------|------------------|
| DABCO                                             | -0.015                               | 0.015                                      | 7.548           | 0.380            |
| Radical-Benzyl                                    | 0.015                                | 0.077                                      | 7.291           | 0.101            |
| Azulene                                           | -0.021                               | 0.004                                      | 7.517           | 0.125            |
| N-methylaniline                                   | -0.031                               | 0.013                                      | 7.517           | 0.139            |
| Aniline                                           | 0.002                                | 0.028                                      | 8.082           | 0.384            |
| 1-naphtol                                         | -0.019                               | 0.006                                      | 7.916           | 0.170            |
| Thioanisole                                       | -0.022                               | -0.015                                     | 8.076           | 0.151            |
| Hydroquinone                                      | -0.011                               | 0.033                                      | 8.208           | 0.314            |
| Piperidine                                        | -0.023                               | -0.050                                     | 8.807           | 0.754            |
| Dibenzofuran                                      | -0.024                               | -0.041                                     | 8.306           | 0.174            |
| Radical-Allyl                                     | 0.015                                | 0.072                                      | 8.141           | 0.063            |
| Naphtalene                                        | -0.023                               | -0.016                                     | 8.270           | 0.127            |
| Pyrrrole                                          | -0.018                               | -0.023                                     | 8.428           | 0.213            |
| Anisole                                           | -0.027                               | -0.027                                     | 8.482           | 0.244            |
| E-hexatriene                                      | -0.018                               | -0.004                                     | 8.436           | 0.181            |
| Benzimidazole                                     | -0.022                               | -0.036                                     | 8.640           | 0.246            |
| Radical-Cyclopentadienyl                          | 0.049                                | 0.102                                      | 8.550           | 0.176            |
| Phenol                                            | -0.020                               | -0.009                                     | 8.747           | 0.246            |
| (CH <sub>3</sub> ) <sub>2</sub> S                 | -0.029                               | -0.065                                     | 8.803           | 0.068            |
| Radical-Propargyl                                 | 0.015                                | 0.054                                      | 8.700           | 0.035            |
| Pyridazine                                        | -0.016                               | -0.006                                     | 9.317           | 0.621            |
| Thiophene                                         | -0.022                               | -0.048                                     | 9.122           | 0.218            |
| Furan                                             | -0.020                               | -0.036                                     | 9.109           | 0.203            |
| Thymine                                           | -0.025                               | -0.057                                     | 9.251           | 0.295            |
| Bromobenzene                                      | -0.023                               | -0.034                                     | 9.231           | 0.233            |
| Methylamine                                       | -0.032                               | -0.098                                     | 9.789           | 0.680            |
| Butadiene                                         | -0.019                               | -0.028                                     | 9.254           | 0.177            |
| Chlorobenzene                                     | -0.024                               | -0.037                                     | 9.319           | 0.227            |
| Phenylsilane                                      | -0.003                               | -0.066                                     | 9.416           | 0.216            |
| Pyridine                                          | -0.021                               | -0.073                                     | 9.772           | 0.522            |
| Fluorobenzene                                     | -0.026                               | -0.043                                     | 9.469           | 0.245            |
| Benzene                                           | -0.072                               | -0.157                                     | 9.474           | 0.146            |
| Pyrazine                                          | -0.002                               | -0.083                                     | 9.736           | 0.367            |
| Tetrachloroethene                                 | -0.013                               | -0.005                                     | 9.665           | 0.332            |
| Pyrimidine                                        | -0.018                               | -0.056                                     | 9.840           | 0.473            |
| Thiazole                                          | -0.023                               | -0.060                                     | 9.656           | 0.247            |
| Methanethiol                                      | -0.018                               | -0.051                                     | 9.548           | 0.050            |
| Oxazole                                           | -0.020                               | -0.054                                     | 9.913           | 0.281            |
| E-1,2-diCl-ethene                                 | -0.018                               | -0.021                                     | 9.977           | 0.306            |
| Oxetane                                           | 0.000                                | -0.111                                     | 9.935           | 0.150            |
| Benzonitrile                                      | -0.030                               | -0.070                                     | 9.939           | 0.163            |
| Bromoethene                                       | -0.019                               | -0.037                                     | 10.062          | 0.206            |
| AsH <sub>3</sub>                                  | -0.016                               | -0.021                                     | 10.489          | 0.727            |
| Radical-CH <sub>3</sub>                           | 0.019                                | 0.061                                      | 9.807           | 0.008            |
| PH <sub>3</sub>                                   | -0.017                               | -0.028                                     | 10.605          | 0.724            |
| Diacetylene                                       | -0.020                               | -0.031                                     | 10.313          | 0.129            |
| NH <sub>3</sub>                                   | -0.001                               | -0.042                                     | 10.939          | 0.712            |
| H <sub>2</sub> S                                  | -0.019                               | -0.035                                     | 10.501          | 0.006            |
| Ethene                                            | -0.022                               | -0.076                                     | 10.765          | 0.196            |
| Bromomethane                                      | -0.049                               | -0.123                                     | 10.791          | 0.003            |
| Acetic acid                                       | -0.018                               | -0.065                                     | 11.007          | 0.302            |
| Methanol                                          | -0.017                               | -0.135                                     | 11.175          | 0.214            |
| Formaldehyde                                      | -0.019                               | -0.090                                     | 11.014          | 0.052            |
| Chloromethane                                     | -0.048                               | -0.155                                     | 11.492          | 0.071            |
| Ethyne                                            | -0.019                               | -0.039                                     | 11.537          | 0.114            |
| Cyanoacetylene                                    | -0.022                               | -0.048                                     | 11.820          | 0.150            |
| Acetonitrile                                      | -0.055                               | -0.194                                     | 12.590          | 0.248            |
| SO <sub>2</sub>                                   | -0.015                               | -0.032                                     | 12.580          | 0.216            |
| Fluoromethane                                     | -0.045                               | -0.208                                     | 13.505          | 0.801            |
| H <sub>2</sub> O                                  | -0.020                               | -0.089                                     | 12.781          | 0.089            |
| HCl                                               | -0.019                               | -0.038                                     | 12.841          | 0.063            |
| All species:                                      |                                      |                                            |                 |                  |
| MIN                                               | -0.072                               | -0.208                                     |                 | 0.003            |
| MAX                                               | 0.049                                | 0.102                                      |                 | 0.801            |
| Non-radical, Non-hydride, non-haloalkane species: |                                      |                                            |                 |                  |
| MIN                                               | -0.072                               | -0.194                                     |                 | 0.050            |
| MAX                                               | 0.002                                | 0.033                                      |                 | 0.754            |

<sup>a</sup>Calculated thermal energy to bring the AIE from 0 K to 298 K. <sup>b</sup>Calculated energy to bring the electronic (A)IE to 298 K. <sup>c</sup>CCSD(T)/CBS estimate of the non-relativistic VIE. <sup>d</sup>CCSD(T)/CBS estimate of the non-relativistic  $\lambda$ . MIN and MAX refer to the minimum and maximum values explored by each quantity.

Table S3 Deviation of electronic AIE (ROHF/ROKS) from the electronic, non-relativistic reference values ( $IE_{el,NR}$ , †Table S1) before and after linear regression [eV]

| Method           | MAD   | RMSD  | $\Delta AIE_{\min}$ | $\Delta AIE_{\max}$ | Slope | Intercept | RMSD <sub>reg</sub> | $\Delta AIE_{\min,reg}$ | $\Delta AIE_{\max,reg}$ |
|------------------|-------|-------|---------------------|---------------------|-------|-----------|---------------------|-------------------------|-------------------------|
| HF               | 1.035 | 1.082 | -1.623              | 0.420               | 0.972 | 1.255     | 0.354               | -0.669                  | 1.403                   |
| B3LYP            | 0.154 | 0.172 | -0.332              | 0.060               | 0.984 | 0.300     | 0.088               | -0.211                  | 0.198                   |
| B2PLYPD          | 0.165 | 0.177 | -0.328              | -0.018              | 0.988 | 0.278     | 0.061               | -0.160                  | 0.127                   |
| BHandHLYP        | 0.249 | 0.268 | -0.447              | 0.695               | 0.999 | 0.194     | 0.197               | -0.267                  | 0.879                   |
| LC-PBE           | 0.188 | 0.223 | -0.110              | 0.481               | 1.020 | -0.372    | 0.129               | -0.232                  | 0.364                   |
| LC- $\omega$ PBE | 0.086 | 0.108 | -0.180              | 0.268               | 1.019 | -0.209    | 0.100               | -0.193                  | 0.260                   |
| M06              | 0.168 | 0.193 | -0.431              | 0.019               | 1.001 | 0.153     | 0.097               | -0.264                  | 0.187                   |
| M06-2X           | 0.072 | 0.092 | -0.256              | 0.255               | 1.008 | -0.072    | 0.091               | -0.257                  | 0.278                   |
| M06-HF           | 0.292 | 0.339 | -0.327              | 0.920               | 0.981 | -0.061    | 0.227               | -0.574                  | 0.601                   |
| M11              | 0.083 | 0.104 | -0.158              | 0.294               | 1.003 | -0.056    | 0.100               | -0.185                  | 0.276                   |
| MP2              | 0.180 | 0.374 | -0.261              | 1.980               | 0.920 | 0.683     | 0.346               | -0.461                  | 1.756                   |
| PBE0             | 0.177 | 0.195 | -0.375              | 0.097               | 1.006 | 0.119     | 0.086               | -0.194                  | 0.275                   |
| PM3              | 0.445 | 0.637 | -2.396              | 1.552               | 1.207 | -1.853    | 0.592               | -2.182                  | 1.506                   |
| $\omega$ B97XD   | 0.131 | 0.148 | -0.300              | 0.055               | 0.999 | 0.138     | 0.073               | -0.173                  | 0.181                   |

Table S4 Experimental AIEs (at 0 K) from PFI experiments [eV].

| Quantity                                                                                  | Descriptor                    | Slope [eV <sup>-1</sup> ] | Ref. |
|-------------------------------------------------------------------------------------------|-------------------------------|---------------------------|------|
| Aqueous phase oxidation reactions                                                         |                               |                           |      |
| log(k), CO <sub>3</sub> <sup>•-</sup> + phenolate                                         | $\Delta G_{SET}^{\circ}$      | -2.03                     | 20   |
| log(k), CO <sub>3</sub> <sup>•-</sup> + anilines                                          | $\Delta G_{SET}^{\circ}$      | -2.89                     | 20   |
| log(k), O <sub>3</sub> + phenol/phenolate                                                 | $VIE_{aq,DFT}$                | -3.78                     | 21   |
| log(k), O <sub>3</sub> + aromatics                                                        | $-\epsilon_{HOMO}$            | -2.2                      | 22   |
| log(k), O <sub>3</sub> + aromatics                                                        | $-\epsilon_{HOMO}$            | -4.7                      | 22   |
| ln(k <sub>app</sub> ), [FeO <sub>4</sub> ] <sup>2-</sup> + organics                       | $IE_{DFT}^{\circ a}$          | -4.8 <sup>b</sup>         | 23   |
| log(k <sub>app</sub> ), <sup>c</sup> H <sub>2</sub> O <sub>2</sub> (activated) + organics | $-\epsilon_{HOMO}$            | -1.95                     | 24   |
|                                                                                           |                               | -4.53                     | 24   |
| log(k), <sup>1</sup> O <sub>2</sub> + phenols/phenolates                                  | $\Delta G_{1/2,calc}^{\circ}$ | -2.46                     | 25   |
| log(k), CO <sub>3</sub> <sup>•-</sup> + phenols/phenolates                                | $\Delta G_{1/2,calc}^{\circ}$ | -1.54                     | 25   |
| log(k), MnO <sub>2</sub> + anilines                                                       | $-\epsilon_{HOMO}$            | -6.2                      | 26   |
| log(k), MnO <sub>2</sub> + anilines                                                       | $\Delta G_{1/2,calc}^{\circ}$ | -5.4                      | 26   |
| log(k), CO <sub>3</sub> <sup>•-</sup> + anilines                                          | $\Delta G_{1/2,calc}^{\circ}$ | -1.95                     | 27   |
| log(k), CO <sub>3</sub> <sup>•-</sup> + aliphatic amines                                  | $\Delta G_{1/2,calc}^{\circ}$ | -1.51                     | 27   |
| log(k), <sup>3</sup> benzophenone + N-containing organics                                 | $\Delta G_{1/2,calc}^{\circ}$ | -1.41                     | 27   |
| log(k), <sup>3</sup> MAP + N-containing organics                                          | $\Delta G_{1/2,calc}^{\circ}$ | -4.68                     | 27   |
| log(k), HO <sup>•</sup> + phenols, alkanes, alcohols                                      | $-\epsilon_{HOMO}$            | -0.50                     | 28   |
| Gas phase oxidation reactions                                                             |                               |                           |      |
| log(k), NO <sub>3</sub> <sup>d</sup>                                                      | $-\epsilon_{HOMO}$            | -1.0                      | 29   |
|                                                                                           | $VIE_{calc}$                  | -1.49                     | 29   |

<sup>a</sup>Methods section doesn't detail the type of IE. <sup>b</sup>No unit given in reference, [eV] assumed.

<sup>c</sup>Two slopes for log(k<sub>app</sub>) at pH 7 and 10. <sup>d</sup>QSAR model containing both  $VIE_{calc}$  and  $-\epsilon_{HOMO}$ , among other descriptors.
